# Supplementary material for: Niclosamide encapsulated polymeric nanocarriers for targeted cancer therapy
Source: Royal Society of Chemistry journal article supplement (doi:10.1039/c9ra03407b), 2019-01-01
Supplement: c9ra03407b1.pdf [file c9ra03407b1.pdf]

## Niclosamide encapsulated polymeric nanocarriers for targeted cancer therapy

Nishant Kumar Jain,<sup>a</sup> Prabhuraj R S,<sup>b</sup> M C Bavya,<sup>a</sup> Rajendra Prasad,<sup>a</sup> Rajdip Bandyopadhyaya,<sup>c</sup> V.G.M.Naidu,<sup>d</sup> and Rohit Srivastava\*<sup>a</sup>

<sup>a</sup>Department of Biosciences and Bioengineering, Indian Institute of Technology Bombay (IIT-B), Powai, Mumbai, 400076, India

<sup>b</sup>Centre for Research in Nanotechnology and Science, Indian Institute of Technology Bombay (IIT-B), Powai, Mumbai, 400076, India

<sup>c</sup>Department of chemical engineering, Indian Institute of Technology Bombay (IIT-B), Powai, Mumbai, 400076, India

<sup>d</sup>Department of **Pharmacology & Toxicology**, National Institute of Pharmaceutical Education and Research (NIPER), Guwahati, Assam, 781125, India

### Corresponding Author

\*Email:

Rohit Srivastava: [rsrivasta@iitb.ac.in](mailto:rsrivasta@iitb.ac.in)

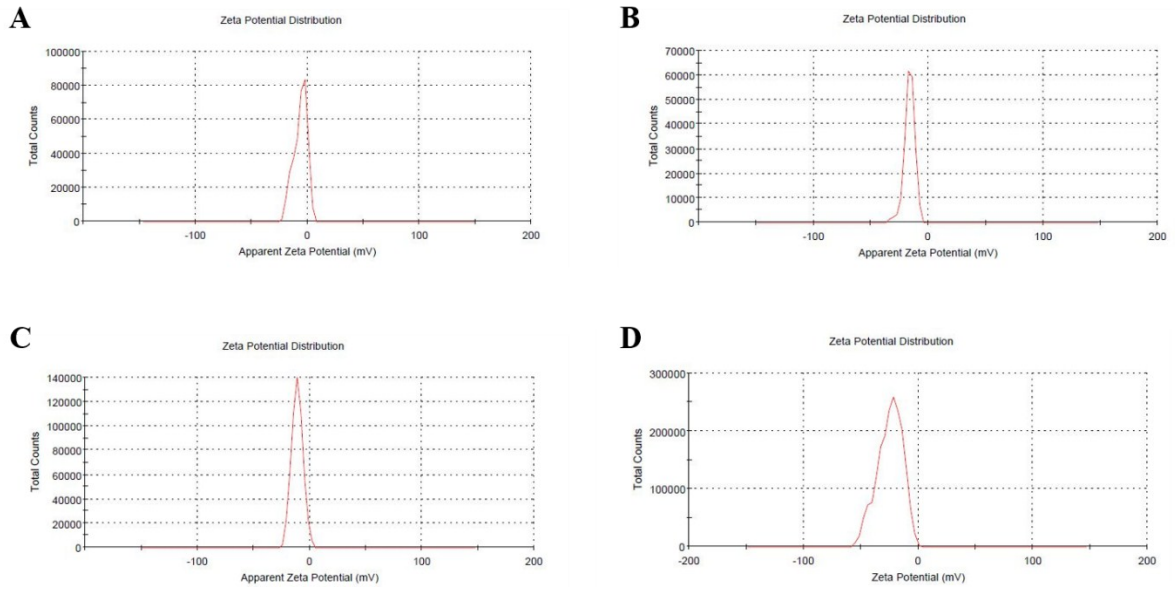

**Figure S1: Zeta analysis of (A) PLGA NP, (B) [(PLGA NP)HA], (C) NIC-PLGA NP and (D) [(NIC-PLGA NP)HA]**

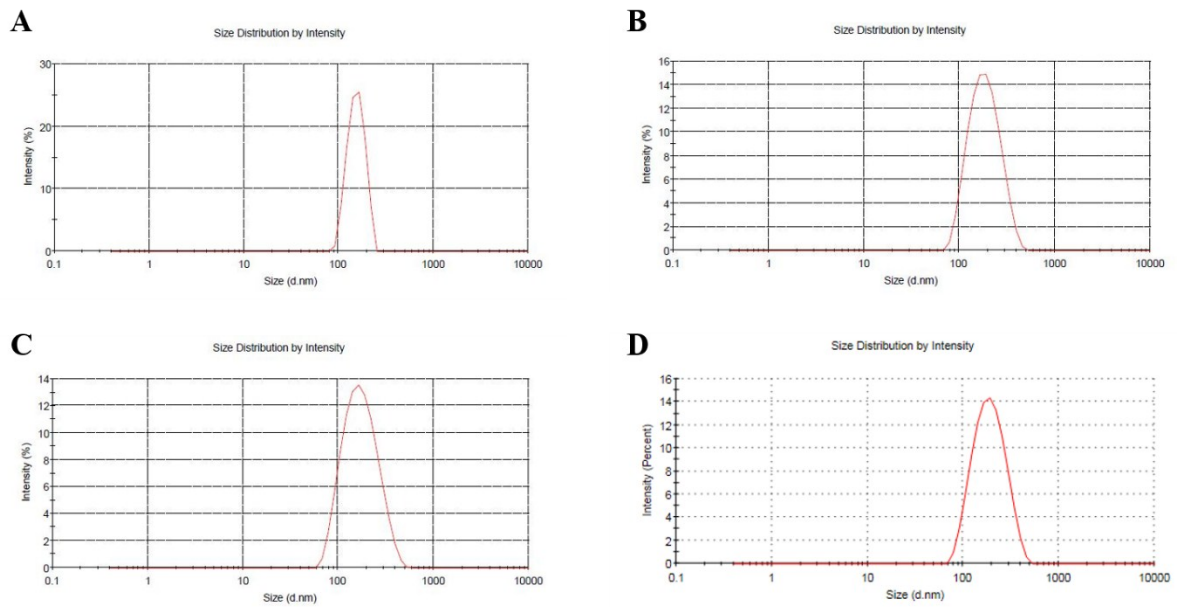

**Figure S2: Particle size analysis of (A) PLGA NP, (B) [(PLGA NP)HA], (C) NIC-PLGA NP and (D) [(NIC-PLGA NP)HA]**

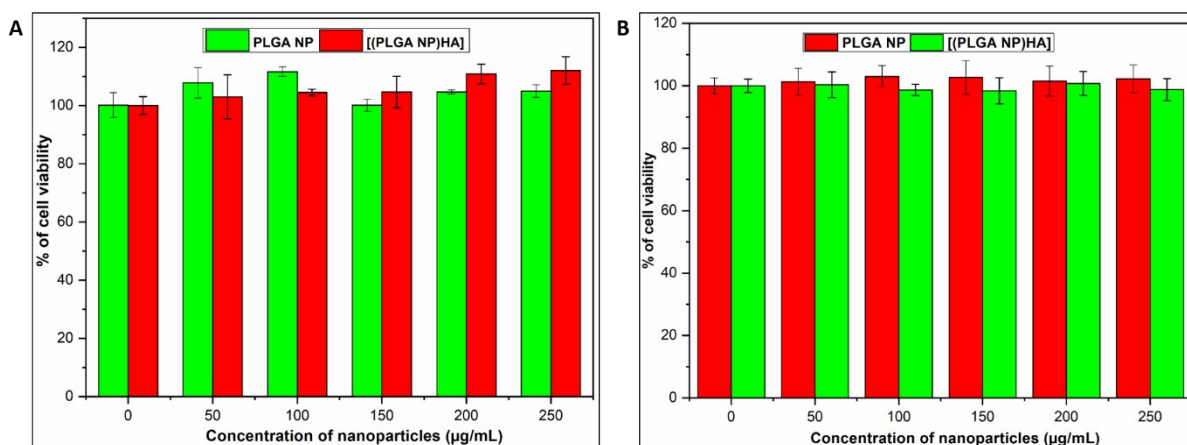

**Figure S3: In-vitro biocompatibility of blank PLGA NP and [(PLGA NP)HA] in A) MDA-MB-231 cells and B) L929 Cells**

**Table S1: DLS, zeta potential and entrapment efficiency of the prepared formulations**

| Formulation       | DLS (nm)  | PDI   | Zeta potential (mV) | Entrapment Efficiency (%) |
|-------------------|-----------|-------|---------------------|---------------------------|
| PLGA NP           | 159.9±4.3 | 0.130 | -6.47±5.99          | -                         |
| [(PLGA NP)HA]     | 191.6±1.5 | 0.150 | -16.3±4.64          | -                         |
| NIC-PLGA NP       | 178.2±4.0 | 0.108 | -11.2±5.02          | 86.18±0.73                |
| [(NIC-PLGA NP)HA] | 201.8±3.6 | 0.164 | -24.9±7.21          | 79.19±0.16                |
